# Supplementary material for: Effects of sgRNAs, Promoters, and Explants on the Gene Editing Efficiency of the CRISPR/Cas9 System in Chinese Kale
Source: MDPI journal article supplement (doi:10.3390/ijms241713241), 2023-08-26
Supplement: s1 [file s1]

**Table S3.** Mutation types of *BoaCRTISO* in Chinese kale.

| Mutation type                | Bi-allelic | Homozygous | Heterozygous | Chimeric | WT    |
|------------------------------|------------|------------|--------------|----------|-------|
| No. of plants with mutations | 0          | 0          | 8            | 7        | 2     |
| Mutation rate (%)            | 0          | 0          | 47.06        | 41.18    | 11.76 |
