# Supplementary material for: Effects of sgRNAs, Promoters, and Explants on the Gene Editing Efficiency of the CRISPR/Cas9 System in Chinese Kale
Source: MDPI journal article supplement (doi:10.3390/ijms241713241), 2023-08-26
Supplement: s1 [file s1]

**Table S2.** Mutation rate of *BoaZDS* and *BoaCRTISO* in Chinese kale.

| CRISPR/Cas9<br>Vector | Target gene      | Target site | Number of<br>plants tested | Number of<br>mutants | Mutation<br>rate (%) |
|-----------------------|------------------|-------------|----------------------------|----------------------|----------------------|
| 35S-<br>CRISPR/Cas9   | <i>BoaZDS</i>    | sgRNA: Z1   | 50                         | 29                   | 58                   |
| YAO-<br>CRISPR/cas9   | <i>BoaZDS</i>    | sgRNA: Z1   | 57                         | 55                   | 96.49                |
|                       | <i>BoaZDS</i>    | sgRNA: Z2   | 65                         | 52                   | 80                   |
|                       | <i>BoaCRTISO</i> | sgRNA: C1   | 17                         | 15                   | 88.24                |
