# Supplementary material for: Effects of sgRNAs, Promoters, and Explants on the Gene Editing Efficiency of the CRISPR/Cas9 System in Chinese Kale
Source: MDPI journal article supplement (doi:10.3390/ijms241713241), 2023-08-26
Supplement: s1 [file s1]

**Table S4.** Primers were used in this study.

| Primer names             | Sequence of primers (5'-3') | Aims                                           |
|--------------------------|-----------------------------|------------------------------------------------|
| sgRNA: Z1-F              | ATTGAGGAGAGGAACGCAGTAGC     | The synthesis of target site                   |
| sgRNA: Z1-R              | AAACGCTACTGCGTTCCTCTCCT     |                                                |
| sgRNA: Z2-F              | ATTGACCTAACATGAAACCTCCG     |                                                |
| sgRNA: Z2-R              | AAACCGGAGGTTTCATGTTAGGTC    |                                                |
| sgRNA: Z3-F              | ATTGGAGCCTGTACCTTACAAGGG    |                                                |
| sgRNA: Z3-R              | AAACCCTTGTAAGGTACAGGCTCT    |                                                |
| sgRNA: C1-F              | ATTGAATAACCAGAGCTCCCACCA    |                                                |
| sgRNA: C1-R              | AAACTGGTGGGAGCTCTGGTTATT    | Detection of the mutation in transgenic plants |
| sgRNA: Z1-CRISPR test-F  | ATCCCACTGGCCATAGTTAGGC      |                                                |
| sgRNA: Z1-CRISPR test-R  | CAAGTCCAGCTCCAATGATAGCTAC   |                                                |
| sgRNA: Z2-CRISPR test-F  | ATCCCACTGGCCATAGTTAGGC      |                                                |
| sgRNA: Z2-CRISPR test-R  | CAAGTCCAGCTCCAATGATAGCTAC   |                                                |
| sgRNA: Z3-CRISPR test-F  | CTCTCGACGCCGATGTTTCCG       |                                                |
| sgRNA: Z3-CRISPR test-R  | CATCAAGCGGAAGAGGTTGTTGTAG   |                                                |
| sgRNA: C1- CRISPR test-F | ATGAATCTCTGTCTCCGCAACCC     |                                                |
| sgRNA: C1-CRISPR test-R  | AACCTCCATCTCACGACCAACTG     |                                                |
| Hyg-F                    | CGATTGCGTCGCATCGACC         | Detection of the hygromycin resistance gene    |
| Hyg-R                    | TTCTACAACCGGTCGCGGAG        |                                                |
