# Supplementary material for: Effects of sgRNAs, Promoters, and Explants on the Gene Editing Efficiency of the CRISPR/Cas9 System in Chinese Kale
Source: MDPI journal article supplement (doi:10.3390/ijms241713241), 2023-08-26
Supplement: s1 [file s1]

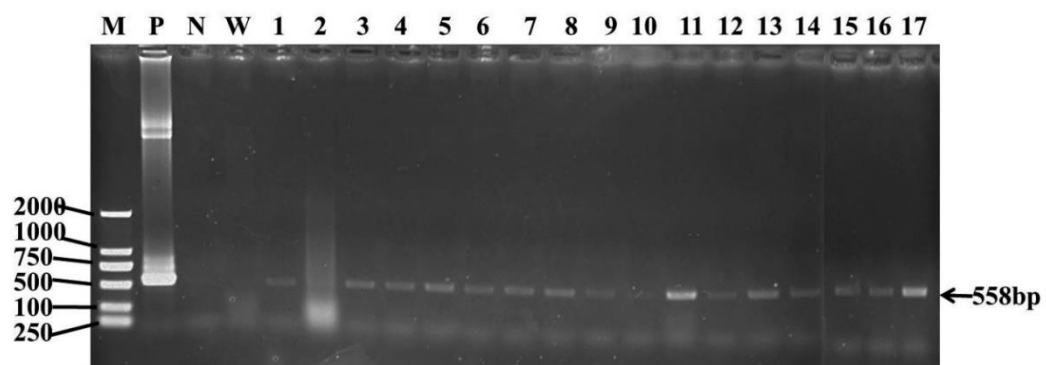

**Figure S4.** Hyg resistance test of the YAO- CRISPR/Cas9 vector at the sgRNA:C1 target site. M: DL2000 marker, P: positive plasmid, V: empty vector, N: wild type, W: water as negative control, 1-17: the number resistant plants.
