# Supplementary material for: Effects of sgRNAs, Promoters, and Explants on the Gene Editing Efficiency of the CRISPR/Cas9 System in Chinese Kale
Source: MDPI journal article supplement (doi:10.3390/ijms241713241), 2023-08-26
Supplement: s1 [file s1]

**Table S1.** The GC content of target sites.

| Name of Target site | Target site sequence             | sgRNA GC content |
|---------------------|----------------------------------|------------------|
| sgRNA: Z1           | <u>CCAG</u> CTACTGCGTTCCTCTCCTC  | 60%              |
| sgRNA: Z2           | <u>CCTC</u> GGAGGTTTCATGTTAGGTC  | 50%              |
| sgRNA: Z3           | <u>CCAG</u> AGCCTGTACCTTACAAGGG  | 55%              |
| sgRNA: C1           | <u>CCCT</u> TGGTGGGAGCTCTGGTTATT | 50%              |
