# Supplementary material for: Effects of sgRNAs, Promoters, and Explants on the Gene Editing Efficiency of the CRISPR/Cas9 System in Chinese Kale
Source: MDPI journal article supplement (doi:10.3390/ijms241713241), 2023-08-26
Supplement: s1 [file s1]

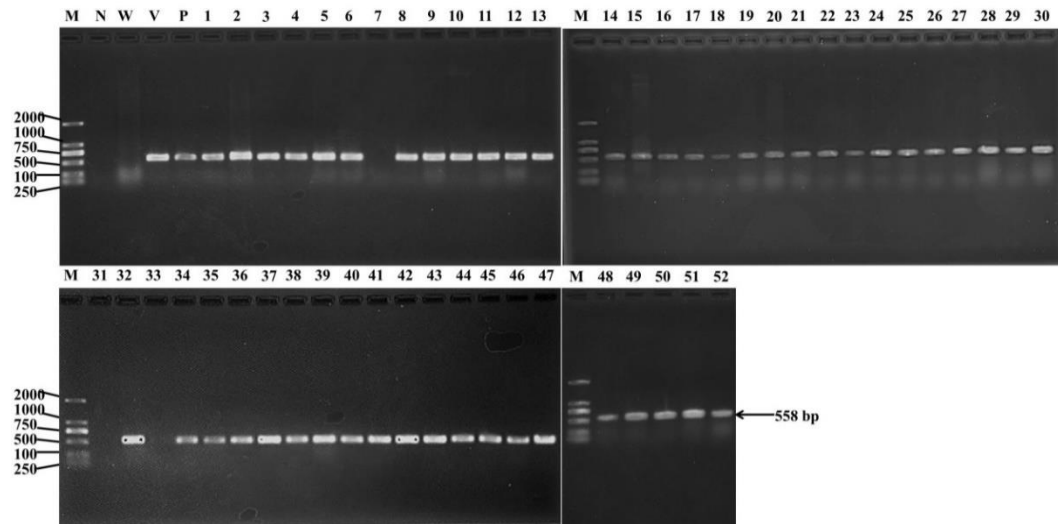

**Figure S1.** Hyg resistance test of the 35S- CRISPR/Cas9 vector at the sgRNA: Z1 target site. M: DL2000 marker, N: wild type, W: water as negative control, V: empty vector, P: positive plasmid, 1-52: the number resistant plants.
