# Supplementary material for: Effects of sgRNAs, Promoters, and Explants on the Gene Editing Efficiency of the CRISPR/Cas9 System in Chinese Kale
Source: Int J Mol Sci. 2023 Aug 26;24(17):13241. doi: 10.3390/ijms241713241 (PMC10487834; doi:10.3390/ijms241713241)
Supplement: Supplementary file 1 [file ijms-24-13241-s001.zip]

Archive with 8 entries (8 files):
- Figure S1. Hyg resistance test of the 35S- CRISPR-Cas9 vector at the sgRNA Z1 target site.pdf
- Figure S2. Hyg resistance test of the YAO- CRISPR-Cas9 vector at the sgRNA Z1 target site.pdf
- Figure S3. Hyg resistance test of the YAO- CRISPR-Cas9 vector at the sgRNA Z2 target site.pdf
- Figure S4. Hyg resistance test of the YAO- CRISPR-Cas9 vector at the sgRNAC1 target site.pdf
- Table S1. The GC content of target sites.pdf
- Table S2. Mutation rate of BoaZDS and BoaCRTISO in Chinese kale.pdf
- Table S3. Mutation types of BoaCRTISO in Chinese kale.pdf
- Table S4. Primers were used in this study.pdf
